# Supplementary material for: Direct high-precision radon quantification for interpreting high-frequency greenhouse gas measurements
Source: Copernicus journal article supplement (doi:10.5194/amt-18-151-2025), 2025-01-13
Supplement: Supplementary file 2 [file amt-18-151-2025-supplement.zip]

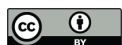

*Supplement of*

## **Direct high-precision radon quantification for interpreting high-frequency greenhouse gas measurements**

**Dafina Kikaj et al.**

*Correspondence to:* Dafina Kikaj ([dafina.kikaj@npl.co.uk](mailto:dafina.kikaj@npl.co.uk))

- [amt-18-151-2025-supplement-title-page.pdf](#)
- [amt-2024-54-supplement-version3.pdf](#)
- [fitting\\_algorithm.zip](#)

The copyright of individual parts of the supplement might differ from the article licence.
